# Supplementary material for: Hydrogenated hematite nanostructures for high-efficiency solar water oxidation
Source: Royal Society of Chemistry journal article supplement (doi:10.1039/c6ra18896f), 2016-01-01
Supplement: c6ra18896f1.pdf [file c6ra18896f1.pdf]

## Supporting Information

### **Hydrogenated Hematite Nanostructures for High-Efficiency Solar Water Oxidation**

*Litao Zhou,<sup>†</sup> Xiaolin Lv,<sup>†</sup> Yuting Nie, Jiujuan Deng, Hui Zhang, Xuhui Sun,<sup>\*</sup> and Jun Zhong<sup>\*</sup>*

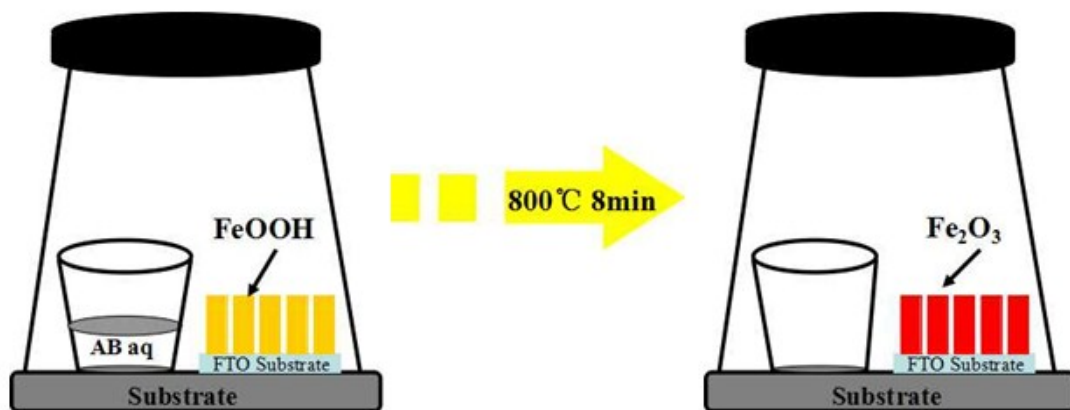

**Figure S1:** Experimental setup for the preparation of the AB-treated hematite.

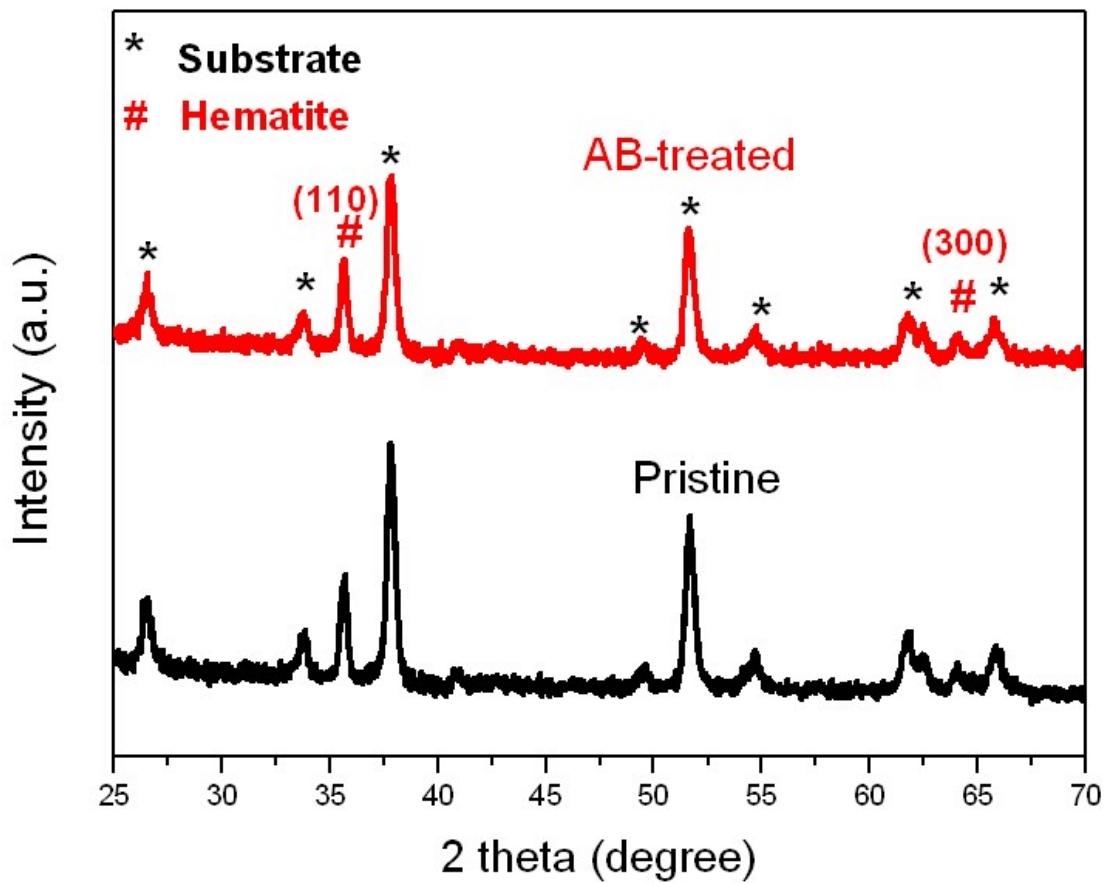

Figure S2: XRD spectra of the pristine and AB-treated hematite nanostructures.

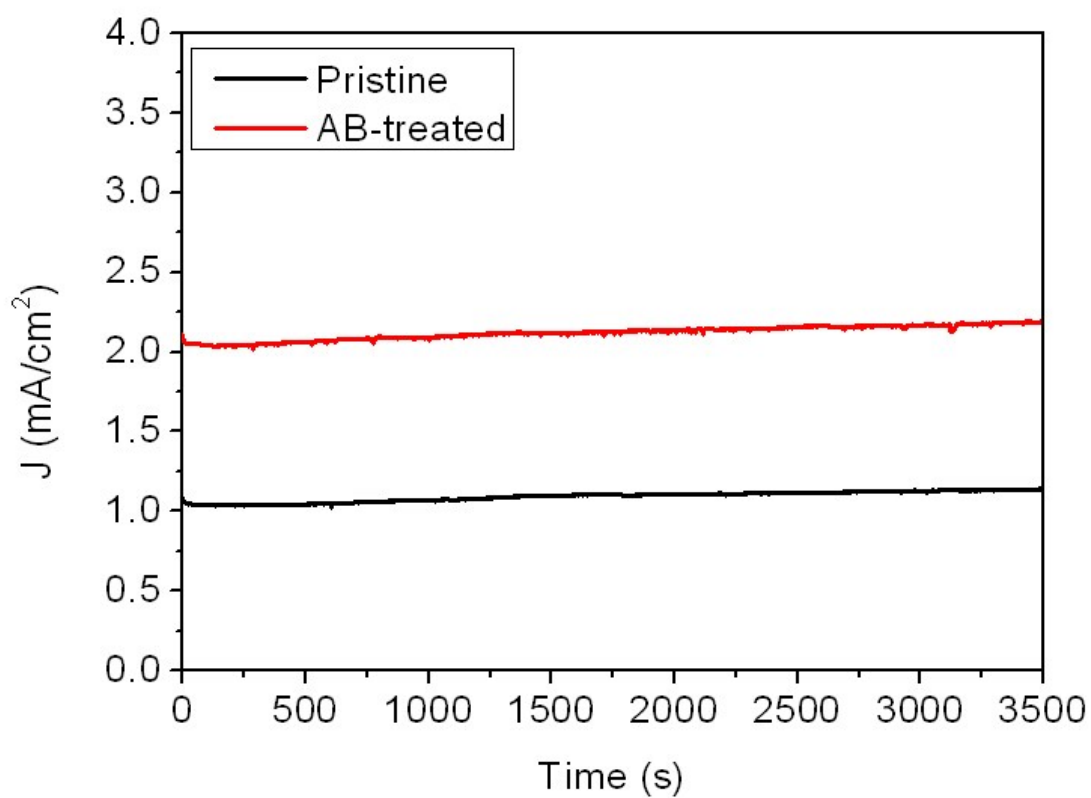

**Figure S3:** Photochemical stability curves of the pristine and AB-treated hematite photoanodes collected at 1.23 V vs. RHE.

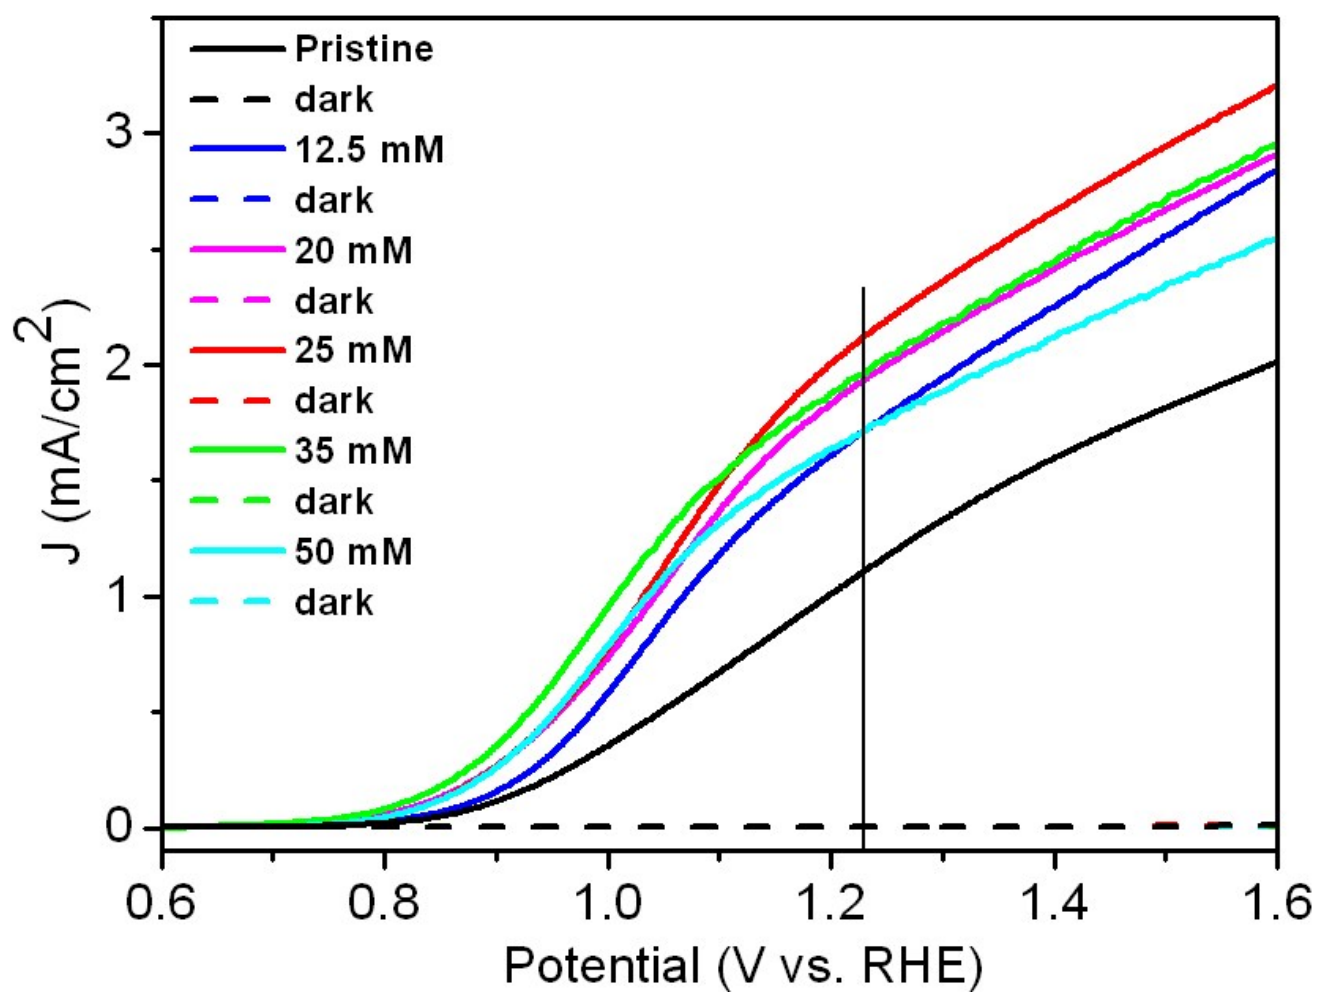

**Figure S4:**  $J$ - $V$  scans of the AB-treated hematite photoanodes at various AB concentrations.

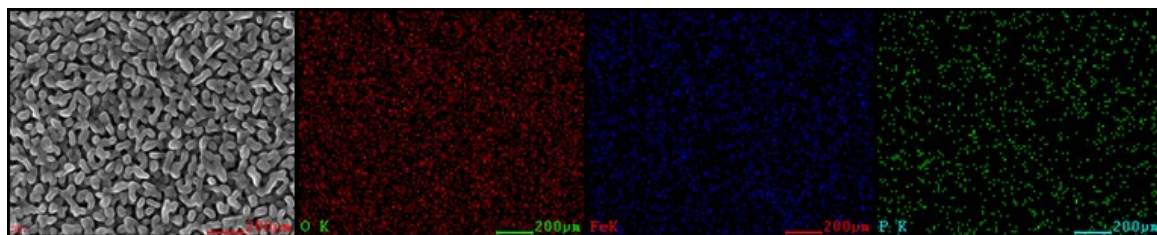

**Figure S5:** SEM image and the corresponding elemental mappings of the P-doped/AB-treated hematite photoanode. P mapping clearly confirms the P-doping in hematite.

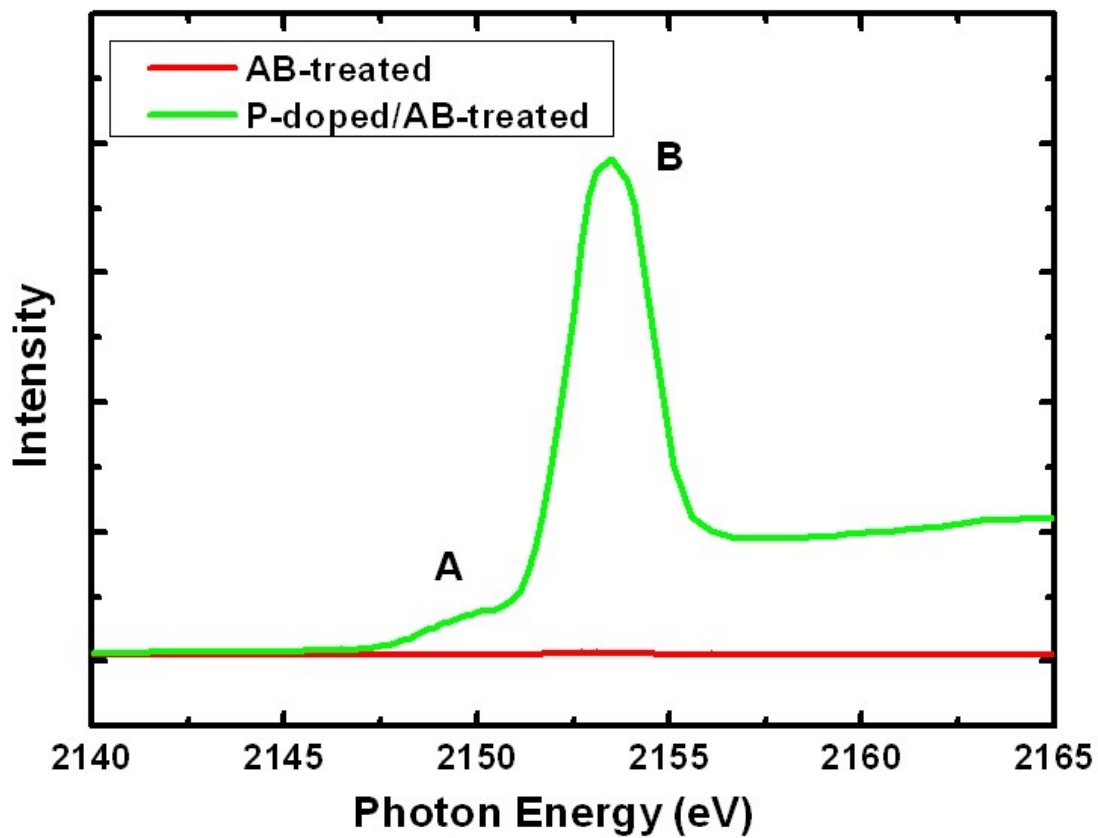

**Figure S6:** P *K*-edge XAS spectra of the AB-treated and P-doped/AB-treated hematite photoanodes. The spectrum of the P-doped/AB-treated sample indicates the P-doping. The small pre-peak A clearly reveals the existence of FePO<sub>4</sub> in the sample.

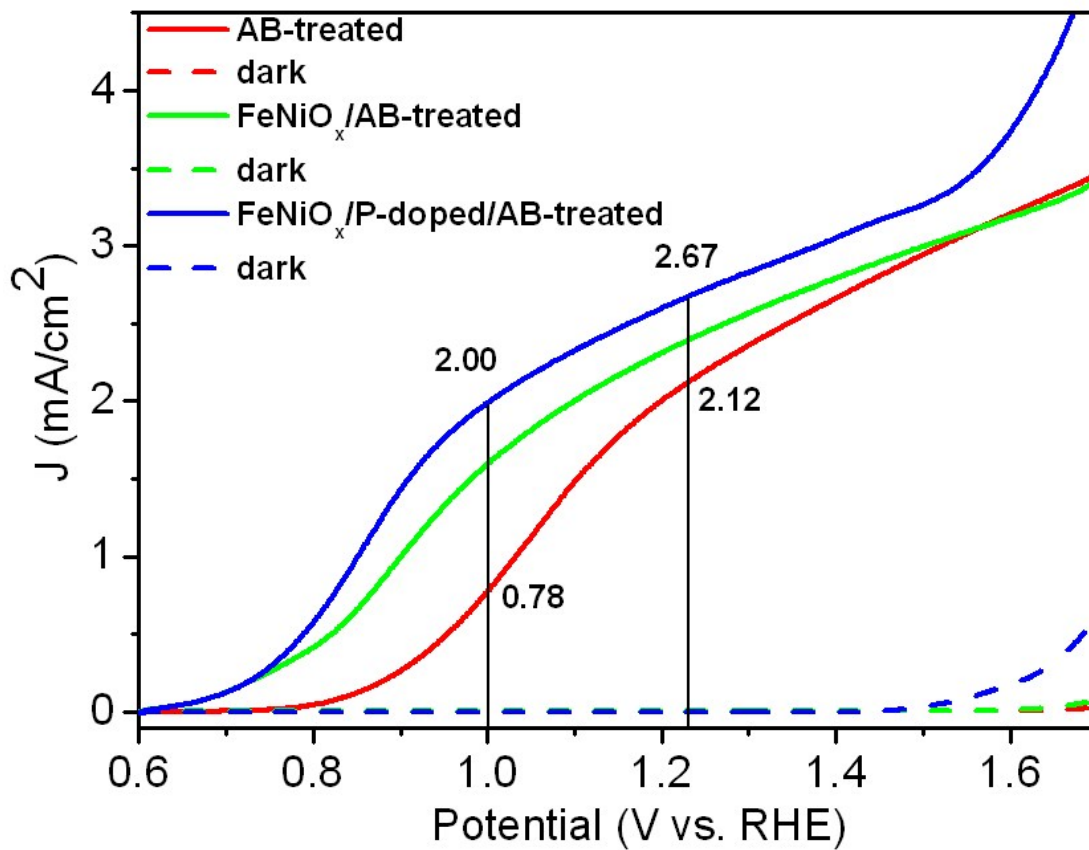

**Figure S7:**  $J$ - $V$  scans of the AB-treated, FeNiO<sub>x</sub>/AB-treated and FeNiO<sub>x</sub>/ P-doped/AB-treated hematite photoanodes.



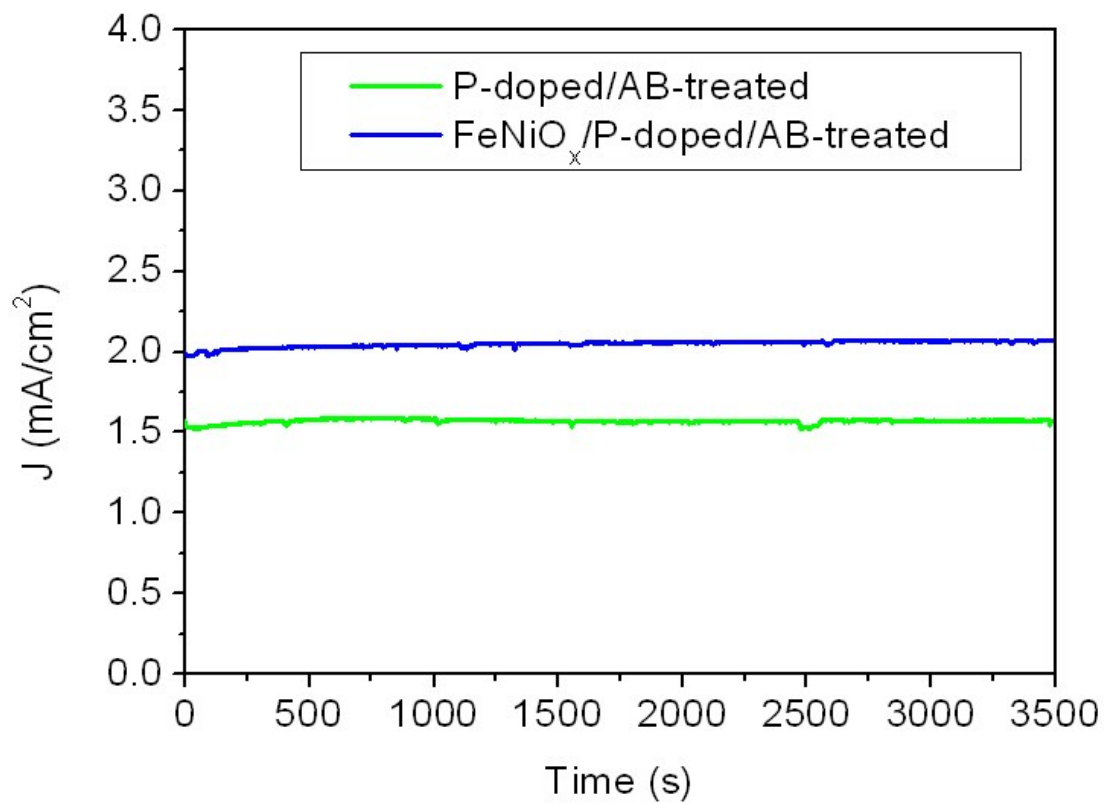

**Figure S8:** Photochemical stability curves of the P-doped/AB-treated and FeNiO<sub>x</sub>/ P-doped/AB-treated hematite photoanodes collected at 1.0 V vs. RHE.

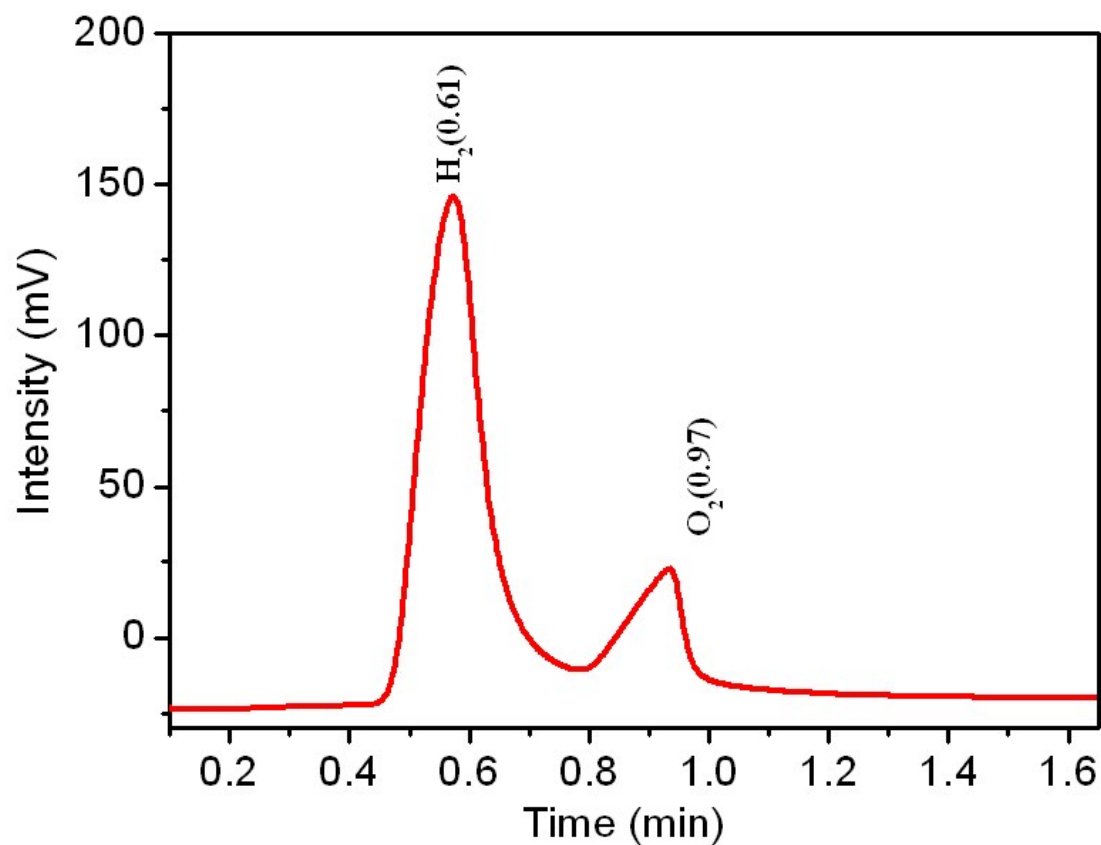

**Figure S9:** Final product detection using a gas chromatograph (GC7890T system, using N<sub>2</sub> as carrier gas and the TCD temperature was set to be 130 °C). H<sub>2</sub> and O<sub>2</sub> can be clearly detected confirming the product.

| Sample description                                                         | Preparation method                                    | Further modifications                                               | Photocurrent<br>(mA/cm <sup>2</sup> ) at 1.0<br>V vs. RHE | Journal and year                             |
|----------------------------------------------------------------------------|-------------------------------------------------------|---------------------------------------------------------------------|-----------------------------------------------------------|----------------------------------------------|
| 3D-Fe <sub>2</sub> O <sub>3</sub> nanocore                                 | Ultrasonic spray pyrolysis                            | Ti-doping/Au layer/Co-Pi<br>catalyst                                | 2.6                                                       | Energy Environ. Sci.<br>2014, Ref. 21        |
| Fe <sub>2</sub> O <sub>3</sub>                                             | Hydrothermal method                                   | Pt-doping/Co-Pi catalyst                                            | 2.3                                                       | Sci. Rep. 2013, Ref. 33                      |
| Hydrogenated- Fe <sub>2</sub> O <sub>3</sub>                               | Hydrothermal method                                   | P-doping/FeNiO <sub>x</sub> catalyst                                | 2.0                                                       | <b>This work</b>                             |
| 3D-Fe <sub>2</sub> O <sub>3</sub> nanospiked array                         | Ultrasonic spray pyrolysis                            | Ti-doping/Co-Pi catalyst                                            | 2.0                                                       | Nano Lett. 2014, Ref. 20                     |
| 1D Fe <sub>2</sub> O <sub>3</sub> grown on 3D<br>Sb-doped SnO <sub>2</sub> | Hydrothermal method                                   | TiO <sub>2</sub> layer/Co-Pi catalyst                               | 2.0                                                       | Adv. Sci. 2015, Ref. 34                      |
| Fe <sub>2</sub> O <sub>3</sub>                                             | Deposition-annealing<br>process                       | Ti-doping                                                           | 1.75                                                      | Nano Lett. 2011, Ref. 17                     |
| Fe <sub>2</sub> O <sub>3</sub>                                             | Hydrothermal method                                   | P-doping/Co-Pi catalyst                                             | 1.6                                                       | Energy Environ. Sci.<br>2015, Ref. 15        |
| Fe <sub>2</sub> O <sub>3</sub>                                             | APCVD                                                 | Al <sub>2</sub> O <sub>3</sub> layer/FeNiO <sub>x</sub><br>catalyst | 1.5                                                       | J. Am. Chem. Soc. 2015,<br>Ref. 14           |
| Fe <sub>2</sub> O <sub>3</sub>                                             | APCVD                                                 | IrO <sub>2</sub> catalyst                                           | 1.2                                                       | Angew. Chem., Int. Ed.<br>2010, Ref. 5       |
| Re-growth Fe <sub>2</sub> O <sub>3</sub>                                   | Hydrothermal method                                   | FeNiO <sub>x</sub> catalyst                                         | 1.05                                                      | Nat. Commun. 2015,<br>Ref. 3                 |
| Fe <sub>2</sub> O <sub>3</sub>                                             | APCVD                                                 | Co-Pi catalyst                                                      | 1.0                                                       | Energy Environ. Sci.<br>2011, Ref. 4         |
| Fe <sub>2</sub> O <sub>3</sub>                                             | Electrochemical deposition                            | Sn-doping/Co <sup>2+</sup> catalyst                                 | 1.0                                                       | J. Mater. Chem. A<br>2015, Ref. 35           |
| Fe <sub>2</sub> O <sub>3</sub>                                             | Hydrothermal method                                   | Sn and Zr codoping/<br>NiOOH catalyst                               | 1.0                                                       | J. Mater. Chem. A<br>2015, Ref. 36           |
| Fe <sub>2</sub> O <sub>3</sub>                                             | Hydrothermal method                                   | Carbon coating                                                      | 0.9                                                       | Energy Environ. Sci.<br>2013, Ref. 22        |
| Fe <sub>2</sub> O <sub>3</sub>                                             | Hydrothermal method                                   | -----                                                               | 0.8                                                       | Nano Lett. 2011, Ref. 11                     |
| Fe <sub>2</sub> O <sub>3</sub>                                             | Hydrothermal method and<br>hybrid microwave annealing | -----                                                               | 0.8                                                       | ACS Appl. Mater.<br>Interfaces 2015, Ref. 26 |
| Fe <sub>2</sub> O <sub>3</sub>                                             | Hydrothermal method                                   | Ti-doping/Ni(OH) <sub>2</sub> and<br>IrO <sub>2</sub> cocatalyst    | 0.8                                                       | J. Phys. Chem. C 2015,<br>Ref. 37            |
| Fe <sub>2</sub> O <sub>3</sub> grown on patterned<br>FTO                   | Hydrothermal method                                   | -----                                                               | 0.7                                                       | J. Mater. Chem. A<br>2015, Ref. 38           |
| Fe <sub>2</sub> O <sub>3</sub>                                             | Hydrothermal method                                   | Fe <sub>x</sub> Sn <sub>1-x</sub> O <sub>4</sub> layer              | 0.65                                                      | Chem. Sci. 2013, Ref. 39                     |
| Fe <sub>2</sub> O <sub>3</sub> grown on Si nanowire<br>array               | Atomic layer deposition                               | -----                                                               | 0.63                                                      | J. Am. Chem. Soc. 2012,<br>Ref. 40           |
| Fe <sub>2</sub> O <sub>3</sub> Nanoflake array (1D)                        | Thermal oxidation of iron<br>foil                     | Au decoration                                                       | 0.5                                                       | ChemSusChem 2015,<br>Ref. 41                 |
| Fe <sub>2</sub> O <sub>3</sub> with oxygen vacancies                       | Hydrothermal method                                   | -----                                                               | 0.2                                                       | Angew. Chem., Int. Ed.<br>2012, Ref. 18      |

**Table S1:** Comparison of the photocurrent densities of hematite photoanodes at 1.0 V vs. RHE.
